# Supplementary material for: Irreversible impact of early thermal conditions: an integrative study of developmental plasticity linked to mobility in a butterfly species
Source: Oxford University Press journal article supplement (doi:10.1242/jeb.243724), 2022-01-06
Supplement: jeb243724supp.pdf [file jeb243724supp.pdf]

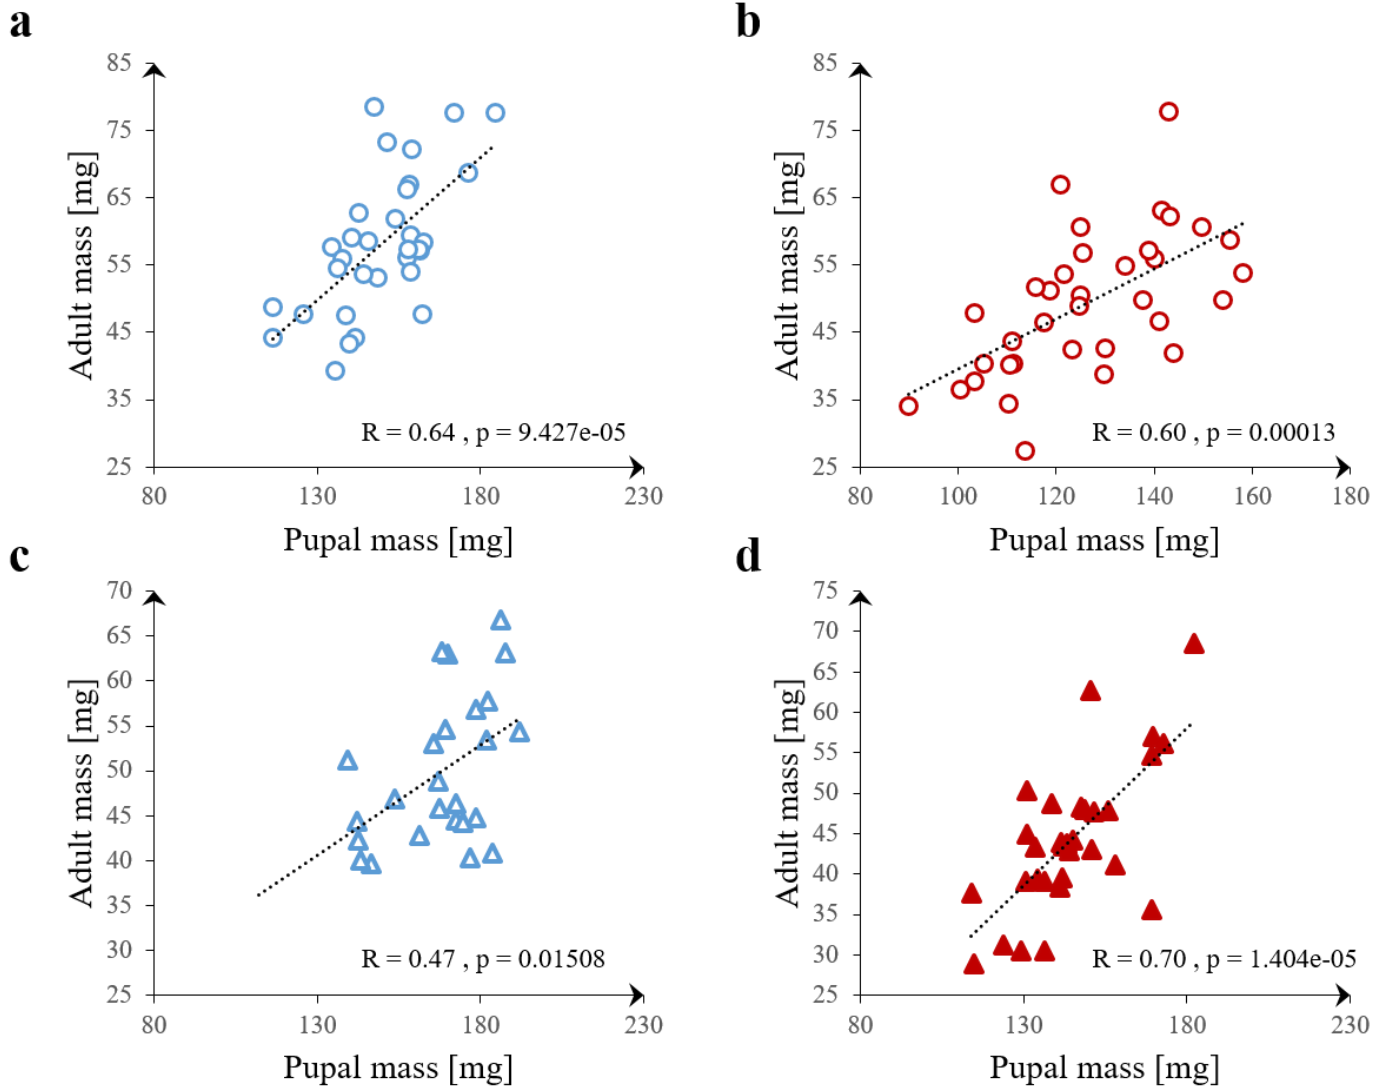

**Fig. S1.** Linear regressions between pupal mass and adult mass for (a) females developed at 18°C, (b) females developed at 25°C, (c) males developed at 18°C, (d) males developed at 25°C. Developmental temperatures are represented by symbol (circle: 18°C, triangle: 25°C) and sexes by colour (open: females, filled: males).

**Table S1.** Mean values and standard deviations (SDs) of each trait for males and females at the two developmental temperatures. Different superscript letters within rows show significant differences among treatments (Tukey HSD).

| Trait                        | Females                    |                            | Males                      |                            |
|------------------------------|----------------------------|----------------------------|----------------------------|----------------------------|
|                              | 18                         | 25                         | 18                         | 25                         |
|                              | N = 35                     | N = 45                     | N = 34                     | N = 43                     |
| <b>Developmental process</b> |                            |                            |                            |                            |
| Development time (days)      | 42.26±1.82 <sup>(a)</sup>  | 22.30±1.74 <sup>(b)</sup>  | 41.68±1.43 <sup>(a)</sup>  | 22.30±1.44 <sup>(b)</sup>  |
| Larval time (days)           | 28.83±1.62 <sup>(a)</sup>  | 15.50±1.44 <sup>(b)</sup>  | 28.65±1.41 <sup>(a)</sup>  | 15.64±1.36 <sup>(b)</sup>  |
| Pupal time (days)            | 13.43±0.85 <sup>(a)</sup>  | 6.80±1.02 <sup>(b)</sup>   | 13.03±0.58 <sup>(a)</sup>  | 6.71±0.50 <sup>(b)</sup>   |
| Pupal mass (mg)              | 14.89±1.66 <sup>(a)</sup>  | 12.71±1.63 <sup>(b)</sup>  | 16.23±1.95 <sup>(c)</sup>  | 14.37±1.56 <sup>(d)</sup>  |
| Weight loss                  | 61.16±5.38 <sup>(a)</sup>  | 60.93±6.63 <sup>(a)</sup>  | 69.35±6.15 <sup>(b)</sup>  | 69.5±4.53 <sup>(b)</sup>   |
| <b>Adult mass</b>            |                            |                            |                            |                            |
| Total mass (mg)              | 58.14±10.41 <sup>(a)</sup> | 49.32±10.64 <sup>(b)</sup> | 51.28±10.47 <sup>(a)</sup> | 44.21±09.13 <sup>(c)</sup> |
| Thorax mass (mg)             | 18.82±2.53 <sup>(a)</sup>  | 15.3±3.03 <sup>(b)</sup>   | 20.73±2.69 <sup>(a)</sup>  | 17.740±3.39 <sup>(c)</sup> |
| Abdomen mass (mg)            | 27.72±8.08 <sup>(a)</sup>  | 24.3±8.08 <sup>(a)</sup>   | 17.87±8.96 <sup>(b)</sup>  | 15.31±5.21 <sup>(b)</sup>  |
| Relative thorax mass         | 0.72±0.18 <sup>(a)</sup>   | 0.68±0.22 <sup>(a)</sup>   | 1.32±0.38 <sup>(b)</sup>   | 1.23±0.27 <sup>(b)</sup>   |

### Wing morphology

|                              |                           |                           |                           |                           |
|------------------------------|---------------------------|---------------------------|---------------------------|---------------------------|
| Wing area (cm <sup>2</sup> ) | 4.37±0.38 <sup>(a)</sup>  | 3.86±0.49 <sup>(b)</sup>  | 4.81±0.36 <sup>(c)</sup>  | 4.24±0.44 <sup>(d)</sup>  |
| Forewing length (cm)         | 2.26±0.09 <sup>(a)</sup>  | 2.09±0.16 <sup>(b)</sup>  | 2.43±0.14 <sup>(c)</sup>  | 2.26±0.10 <sup>(d)</sup>  |
| Aspect ratio Forewing        | 9.60±0.34 <sup>(a)</sup>  | 9.25±0.66 <sup>(a)</sup>  | 10.16±0.76 <sup>(b)</sup> | 9.96±0.36 <sup>(b)</sup>  |
| Wing surface ratio           | 0.95±0.02 <sup>(a)</sup>  | 0.97±0.02 <sup>(b)</sup>  | 0.94±0.02 <sup>(a)</sup>  | 0.94±0.01 <sup>(c)</sup>  |
| Wing loading                 | 13.33±1.60 <sup>(a)</sup> | 13.03±2.36 <sup>(a)</sup> | 10.41±1.53 <sup>(b)</sup> | 10.38±1.36 <sup>(b)</sup> |

### Mobility

|                  |                             |                              |                              |                              |
|------------------|-----------------------------|------------------------------|------------------------------|------------------------------|
| Endurance (sec)  | 248.03±170.8 <sup>(a)</sup> | 169.60±165.92 <sup>(b)</sup> | 197.67±159.06 <sup>(b)</sup> | 227.23±188.47 <sup>(b)</sup> |
| Distance (score) | 4.2±1.45 <sup>(a)</sup>     | 6.46±2.15 <sup>(b)</sup>     | 7.91±2.17 <sup>(c)</sup>     | 9.93±2.08 <sup>(d)</sup>     |

### Physiology

|                                 |                           |                            |                            |                            |
|---------------------------------|---------------------------|----------------------------|----------------------------|----------------------------|
| Flight metabolic rate (ppm/min) | 27.11±9.89 <sup>(a)</sup> | 26.84±10.76 <sup>(a)</sup> | 33.23±11.49 <sup>(b)</sup> | 29.04±10.59 <sup>(b)</sup> |
|---------------------------------|---------------------------|----------------------------|----------------------------|----------------------------|

### Fecundity

|                |                           |                          |
|----------------|---------------------------|--------------------------|
| Number of eggs | 32.97±5.75 <sup>(a)</sup> | 16.5±2.86 <sup>(b)</sup> |
|----------------|---------------------------|--------------------------|

### Oxidative status

|                                  |                              |                              |                              |                              |
|----------------------------------|------------------------------|------------------------------|------------------------------|------------------------------|
| Total antioxidant capacity (OXY) | 20.41±4.94 <sup>(a)</sup>    | 28.60±10.53 <sup>(b)</sup>   | 20.90±6.91 <sup>(a)</sup>    | 23.50±6.55 <sup>(a)</sup>    |
| Superoxide dismutase (SOD)       | 7.91±2.38 <sup>(a)</sup>     | 14.09±7.31 <sup>(b)</sup>    | 7.84±3.42 <sup>(a)</sup>     | 10.71±4.30 <sup>(b)</sup>    |
| 8-OHdG (DNA damage)              | 444.29±227.04 <sup>(a)</sup> | 1081.00±625.4 <sup>(b)</sup> | 493.23±318.25 <sup>(a)</sup> | 896.96±559.82 <sup>(b)</sup> |

**Table S2.** Results of general linear models with PCs 1-4 coordinates for each developmental group. Significant *P*-values are shown in bold.

| Trait            | Females                         |                             | Males                         |                             |
|------------------|---------------------------------|-----------------------------|-------------------------------|-----------------------------|
|                  | 18                              | 25                          | 18                            | 25                          |
| <b>Distance</b>  |                                 |                             |                               |                             |
| PC1              | $F_{1,43}=4.99$ , <b>P=0.04</b> | $F_{1,0.1}=0.02$ , P=0.88   | $F_{1,0.1}=0.01$ , P=0.96     | $F_{1,21}=3.6$ , P=0.07•    |
| PC2              | $F_{1,0.1}=0.02$ , P=0.89       | $F_{1,1}=0.20$ , P=0.66     | $F_{1,1.4}=0.01$ , P=0.76     | $F_{1,0.1}=0.01$ , P=0.98   |
| PC3              | $F_{1,44}=5.15$ , <b>P=0.03</b> | $F_{1,0.1}=0.01$ , P=0.96   | $F_{1,0.1}=0.01$ , P=0.97     | $F_{1,8}=1.41$ , P=0.25     |
| PC4              | $F_{1,4}=0.50$ , P=0.49         | $F_{1,0.7}=0.12$ , P=0.73   | $F_{1,4}=0.29$ , P=0.59       | $F_{1,5}=0.92$ , P=0.35     |
| <b>Endurance</b> |                                 |                             |                               |                             |
| PC1              | $F_{1,44624}=1.30$ , P=0.27     | $F_{1,4041}=0.15$ , P=0.71  | $F_{1,59}=0.01$ , P=0.96      | $F_{1,1847}=0.05$ , P=0.82  |
| PC2              | $F_{1,4121}=0.12$ , P=0.73      | $F_{1,1478}=0.05$ , P=0.82  | $F_{1,100601}=3.39$ , P=0.08• | $F_{1,1036}=0.03$ , P=0.87  |
| PC3              | $F_{1,1408}=0.04$ , P=0.84      | $F_{1,22915}=0.83$ , P=0.37 | $F_{1,4627}=0.16$ , P=0.69    | $F_{1,12289}=0.34$ , P=0.57 |
| PC4              | $F_{1,45136}=1.31$ , P=0.27     | $F_{1,60350}=2.18$ , P=0.15 | $F_{1,72349}=2.44$ , P=0.14   | $F_{1,58966}=1.62$ , P=0.22 |

**Table S3.** Results of the principal component analyses for females at (a) 18°C and at (b) 25°C and for males at (c) 18°C and at (d) 25°C with Eigen values, proportion of variance explained, cumulative proportions of variance explained, and r-values of the correlations between morphological variables and principal components. Significant correlations  $P < 0.05$  in bold.

Table S3a

|                         | PC1           | PC2           | PC3           | PC4          |
|-------------------------|---------------|---------------|---------------|--------------|
| Eigen value             | 3.430         | 2.010         | 1.157         | 0.993        |
| Variance explained (%)  | 42.9          | 25.1          | 14.5          | 12.4         |
| Cumulative variance (%) | 42.9          | 68            | 82.5          | 94.9         |
| Thorax mass             | <b>0.767</b>  | <b>0.459</b>  | -0.251        | 0.249        |
| Abdomen mass            | <b>0.899</b>  | <b>-0.412</b> | -0.097        | 0.026        |
| Relative thorax mass    | <b>-0.483</b> | <b>0.807</b>  | -0.064        | 0.165        |
| Mean wing area          | <b>0.807</b>  | <b>0.522</b>  | 0.220         | -0.030       |
| Forewing length         | <b>0.742</b>  | 0.340         | <b>0.542</b>  | 0.169        |
| Forewing aspect ratio   | -0.136        | <b>-0.531</b> | <b>0.754</b>  | 0.206        |
| Wing surface ratio      | -0.371        | -0.076        | -0.102        | <b>0.893</b> |
| Wing loading            | <b>0.666</b>  | <b>-0.550</b> | <b>-0.399</b> | 0.186        |

Table S3b

|                         | PC1          | PC2           | PC3           | PC4          |
|-------------------------|--------------|---------------|---------------|--------------|
| Eigen value             | 2.845        | 2.430         | 1.224         | 0.967        |
| Variance explained (%)  | 35.6         | 30.4          | 15.3          | 12.1         |
| Cumulative variance (%) | 35.6         | 65.9          | 81.2          | 93.3         |
| Thorax mass             | <b>0.732</b> | 0.275         | <b>0.569</b>  | 0.096        |
| Abdomen mass            | <b>0.770</b> | <b>-0.595</b> | 0.093         | -0.138       |
| Relative thorax mass    | -0.323       | <b>0.784</b>  | <b>0.356</b>  | 0.195        |
| Mean wing area          | <b>0.689</b> | <b>0.639</b>  | 0.082         | -0.149       |
| Forewing length         | <b>0.789</b> | <b>0.521</b>  | -0.223        | 0.179        |
| Forewing aspect ratio   | <b>0.413</b> | -0.01         | <b>-0.688</b> | <b>0.545</b> |
| Wing surface ratio      | 0.538        | 0.784         | <b>0.356</b>  | <b>0.893</b> |
| Wing loading            | <b>0.690</b> | <b>0.640</b>  | 0.082         | 0.186        |

Table S3c

|                         | PC1           | PC2           | PC3           | PC4          |
|-------------------------|---------------|---------------|---------------|--------------|
| Eigen value             | 3.022         | 2.177         | 1.274         | 0.988        |
| Variance explained (%)  | 37.8          | 27.2          | 15.9          | 12.4         |
| Cumulative variance (%) | 37.8          | 65            | 80.9          | 93.3         |
| Thorax mass             | <b>0.784</b>  | 0.075         | -0.476        | <b>0.476</b> |
| Abdomen mass            | <b>0.939</b>  | -0.293        | -0.002        | -0.098       |
| Relative thorax mass    | <b>-0.655</b> | 0.362         | -0.159        | <b>0.596</b> |
| Mean wing area          | 0.366         | <b>0.603</b>  | <b>-0.554</b> | -0.403       |
| Forewing length         | <b>0.447</b>  | <b>0.886</b>  | -0.030        | -0.087       |
| Forewing aspect ratio   | 0.295         | <b>0.708</b>  | 0.409         | 0.324        |
| Wing surface ratio      | 0.076         | 0.274         | <b>0.825</b>  | -0.223       |
| Wing loading            | <b>0.818</b>  | <b>-0.480</b> | 0.163         | 0.266        |

Table S3d

|                         | PC1           | PC2           | PC3           | PC4    |
|-------------------------|---------------|---------------|---------------|--------|
| Eigen value             | 4.312         | 1.452         | 1.240         | 0.519  |
| Variance explained (%)  | 53.9          | 18.1          | 15.5          | 6.492  |
| Cumulative variance (%) | 53.9          | 72            | 87.5          | 94     |
| Thorax mass             | <b>0.912</b>  | 0.266         | -0.297        | 0.297  |
| Abdomen mass            | <b>0.915</b>  | -0.360        | 0.113         | 0.078  |
| Relative thorax mass    | -0.215        | <b>0.834</b>  | <b>-0.410</b> | 0.286  |
| Mean wing area          | <b>0.854</b>  | 0.380         | 0.294         | -0.199 |
| Forewing length         | <b>0.687</b>  | <b>0.389</b>  | <b>0.582</b>  | -0.108 |
| Forewing aspect ratio   | <b>-0.663</b> | -0.187        | <b>0.485</b>  | 0.282  |
| Wing surface ratio      | <b>-0.559</b> | 0.170         | <b>0.613</b>  | 0.269  |
| Wing loading            | <b>0.803</b>  | <b>-0.442</b> | -0.122        | 0.374  |

**Table S4.** Full citation of R packages used for the statistical analyses

| Title                                                                              | Author                                                                                                     | Year | Note                     | URL                                                                                                       |
|------------------------------------------------------------------------------------|------------------------------------------------------------------------------------------------------------|------|--------------------------|-----------------------------------------------------------------------------------------------------------|
| <b>survival:</b> A Package for Survival Analysis in R                              | Terry M Therneau                                                                                           | 2021 | R package version 3.2-13 | <a href="https://CRAN.R-project.org/package=survival">https://CRAN.R-project.org/package=survival</a>     |
| <b>lme4:</b> Linear mixed-effects models using Eigen and S4                        | Douglas Bates and Martin Maechler and Ben Bolker and Steven Walker                                         | 2015 | R package version 1.1-8  | <a href="http://CRAN.R-project.org/package=lme4">http://CRAN.R-project.org/package=lme4</a>               |
| <b>emmeans:</b> Estimated Marginal Means, aka Least-Squares Means                  | Russell V. Lenth and Paul Buerkner and Maxime Herve and Jonathon Love and Hannes Riebl and Henrik Singmann | 2021 | R package version 1.7.0  | <a href="https://CRAN.R-project.org/package=emmeans">https://CRAN.R-project.org/package=emmeans</a>       |
| <b>factoextra:</b> Extract and Visualize the Results of Multivariate Data Analyses | Alboukadel Kassambara and Fabian Mundt                                                                     | 2020 | R package version 1.0.7. | <a href="https://CRAN.R-project.org/package=factoextra">https://CRAN.R-project.org/package=factoextra</a> |
